# Supplementary material for: Point defect detection and strain mapping in Si single crystal by two-dimensional multiplication moiré method
Source: Royal Society of Chemistry journal article supplement (doi:10.1039/d1nr04054e), 2021-01-01
Supplement: d1nr04054e1.pdf [file d1nr04054e1.pdf]

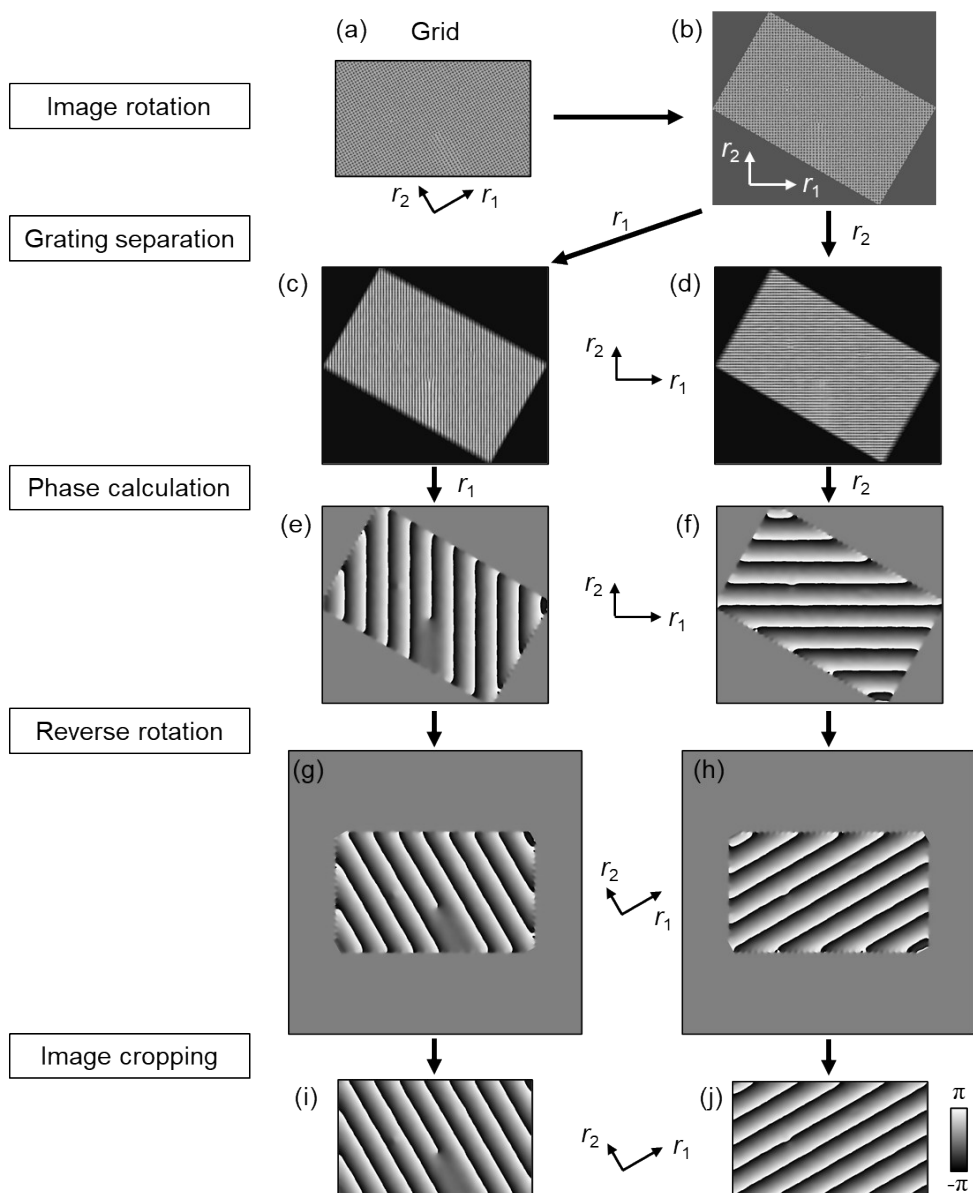

Fig. S1 Measurement process of 1D moiré phases when one or more principal directions of a grid image are away from the horizontal or vertical direction: (a) grid image, (b) grid image after rotation such that at least one of the principal directions is close to the horizontal or vertical direction, (c) and (d) principal gratings in  $r_1$  and  $r_2$  directions, respectively, (e) and (f) moiré phases in  $r_1$  and  $r_2$  directions, respectively, (g) and (h) moiré phase maps after being rotated back to the same orientation as the original grid image, and (i) and (j) moiré phase maps after cropping the image to the same size as the original grid image.
